# Supplementary material for: Comparing Bacterial Community Composition between Healthy and White Plague-Like Disease States in Orbicella annularis Using PhyloChip™ G3 Microarrays
Source: PLoS One. 2013 Nov 20;8(11):e79801. doi: 10.1371/journal.pone.0079801 (PMC3835879; doi:10.1371/journal.pone.0079801)
Supplement: Table S1 — PhyloChip™ G3 operational taxonomic units (OTUs) that contain one or more coral-associated sequences. (XLS) [file pone.0079801.s001.xls]

## Sheet: Coral-assoc OTUs
OTU	Example GenBank Accession Number	Description	Notes	Reference(s)
230	FJ203056.1	Montastraea faveolata White Plague diseased tissue clone SHFG442	Also clones Gven_K24, Dstr_K06, Past_C06	Sunagawa et al., 2009 Sunagawa et al., 2010
247	DQ395353.1	deep-sea octocoral clone ctg_BRRAA53		Penn et al., 2006
271	FJ403097.1	Montastrea faveolata Alteromonadales clone MD2.48		Johnson et al., 2008
300	FJ203377.1	Montastraea faveolata healthy tissue clone SHFH407	Also clone MD3.30	Sunagawa et al., 2009 Johnson et al., 2008
319	FJ202960.1	Montastraea faveolata kept aquarium 23 days clone SGUS606	Also clones SGUS1320, SGUS497, MD2.31	Sunagawa et al., 2009 Johnson et al., 2008
364	FJ203003.1	Montastraea faveolata kept aquarium 23 days clone SGUS1390		Sunagawa et al., 2009
487	FJ203170.1	Montastraea faveolata White Plague diseased tissue clone SHFG575		Sunagawa et al., 2009
576	FJ403082.1	Montastrea faveolata clone MD2.33		Johnson et al., 2008
580	DQ395878.1	deep-sea octocoral clone ctg_CGOF078	Also 13 other octocoral clones, plus Gven_L14	Penn et al., 2006 Sunagawa et al., 2010
587	FJ202113.1	Montastraea faveolata kept aquarium 23 days clone SGUS639	Also clone SGUS989	Sunagawa et al., 2009
597	FJ202771.1	Montastraea faveolata kept aquarium 23 days clone SGUS1003		Sunagawa et al., 2009
627	FJ203235.1	Montastraea faveolata White Plague diseased tissue clone SHFG647		Sunagawa et al., 2009
654	FJ403070.1	Montastrea faveolata clone MD2.21	Also clones MD2.46, MD2.29,	Johnson et al., 2008
694	FJ203091.1	Montastraea faveolata White Plague diseased tissue clone SHFG487		Sunagawa et al., 2009
767	DQ889922.1	Erythropodium caribaeorum clone EC52		Ranzer et al., 2006
834	FJ403091.1	Montastrea faveolata Oceanospirillum clone MD2.42		Johnson et al., 2008
882	FJ202535.1	Montastraea faveolata kept aquarium 23 days clone SGUS906		Sunagawa et al., 2009
953	FJ202933.1	Montastraea faveolata kept aquarium 23 days clone SGUS1172	Also clone SGUS774	Sunagawa et al., 2009
1098	FJ202088.1	Montastraea faveolata kept aquarium 23 days clone SGUS977		Sunagawa et al., 2009
1148	FJ203535.1	Montastraea faveolata healthy tissue clone SHFH606		Sunagawa et al., 2009
1347	FJ202639.1	Montastraea faveolata kept aquarium 23 days clone SGUS1106	Also clones SGUS404, SGUS1516, SGUS1503, SGUS1469, SGUS588	Sunagawa et al., 2009
1402	FJ203132.1	Montastraea faveolata White Plague diseased tissue clone SHFG534		Sunagawa et al., 2009
1465	FJ202297.1	Montastraea faveolata kept aquarium 23 days clone SGUS489		Sunagawa et al., 2009
1479	FJ202634.1	Montastraea faveolata kept aquarium 23 days clone SGUS1328	Also clones SGUS388, SGUS1144	Sunagawa et al., 2009
1556	FJ203045.1	Montastraea faveolat aWhite Plague diseased tissue clone SHFG427		Sunagawa et al., 2009
1586	FJ202272.1	Montastraea faveolata kept aquarium 23 days clone SGUS740		Sunagawa et al., 2009
1607	AY643537.2	White plague like disease Eilat coral reef		Thompson et al., 2006
1725	FJ203223.1	Montastraea faveolata White Plague diseased tissue clone SHFG633	Also clone MD3.48	Sunagawa et al., 2009 Johnson et al., 2008
1766	EF123465.1	Siderastrea siderea black band diseased (BBD) coral tissues clone BBD216b_02f		Sekar et al., 2008
1782	FJ202664.1	Montastraea faveolata kept aquarium 23 days clone SGUS1352		Sunagawa et al., 2009
1804	FJ202983.1	Montastraea faveolata kept aquarium 23 days clone SGUS716		Sunagawa et al., 2009
1907	EF123461.1	Siderastrea siderea black band diseased (BBD) coral tissues clone WA_35bf		Sekar et al., 2008
1920	AM941176.1	coral mucus and reef waters mixture 1-8 m depth clone M26-004		Allers et al., 2008
1931	FJ425616.1	Montastrea faveolata Alteromonadaceae clone MD3.28		Johnson et al., 2008
2094	FJ403057.1	Montastrea faveolata Oceanospirillales clone MD2.8		Johnson et al., 2008
2117	FJ203217.1	Montastraea faveolata White Plague diseased tissue clone SHFG627		Sunagawa et al., 2009
2134	FJ203463.1	Montastraea faveolata healthy tissue clone SHFH516	Also clones Gven_F09, BBD coral tissues clone STX_23f	Sunagawa et al., 2009 Sunagawa et al., 2010 Sekar et al., 2008
2150	AM941178.1	coral mucus and reef waters mixture 1-8 m depth clone M26-022		Allers et al., 2008
2180	FJ203036.1	Montastraea faveolata White Plague diseased tissue clone SHFG417		Sunagawa et al., 2009
2235	FJ203319.1	Montastraea faveolata White Plague diseased tissue clone SHFG739	Also clone MD3.5	Sunagawa et al., 2009 Johnson et al., 2008
2321	FJ203248.1	Montastraea faveolata White Plague diseased tissue clone SHFG662		Sunagawa et al., 2009
2366	FJ202937.1	Montastraea faveolata kept aquarium 23 days clone SGUS1224		Sunagawa et al., 2009
2435	FJ202756.1	Montastraea faveolata kept aquarium 23 days clone SGUS1042		Sunagawa et al., 2009
2503	AY700632.1	Australia: Great Barrier Reef clone PDM-OTU2	Also clones PDW-OTU3, ctg_CGOCA18	Boune & Munn, 2005 Penn et al., 2006
2506	FJ203316.1	Montastraea faveolata White Plague diseased tissue clone SHFG735		Sunagawa et al., 2009
2552	FJ203584.1	Montastraea faveolata healthy tissue clone SHFH664	Also clones SGUS1041, ApaI_IO3, ApaI_F04, MD3.27	Sunagawa et al., 2009 Sunagawa et al., 2010 Johnson et al., 2008
2642	DQ917876.1	Muricea elongata Pseudomonas clone ME74		Ranzer et al., 2006
2737	FJ202522.1	Montastraea faveolata kept aquarium 23 days clone SGUS996	Also clone SGUS1096	Sunagawa et al., 2009
2749	FJ202726.1	Montastraea faveolata kept aquarium 23 days clone SGUS922		Sunagawa et al., 2009
2827	FJ203252.1	Montastraea faveolata White Plague diseased tissue clone SHFG666		Sunagawa et al., 2009
2883	DQ395393.1	deep-sea octocoral clone ctg_BRRAA68		Penn et al., 2006
2915	FJ425594.1	Montastrea faveolata clone MD3.6		Johnson et al., 2008
2922	FJ425591.1	Montastrea faveolata clone MD3.3		Johnson et al., 2008
2983	FJ403058.1	Montastrea faveolata clone MD2.9		Johnson et al., 2008
3308	FJ425613.1	Montastrea faveolata Caedibacter clone MD3.25		Johnson et al., 2008
3452	FJ202233.1	Montastraea faveolata kept aquarium 23 days clone SGUS424		Sunagawa et al., 2009
3457	FJ202510.1	Montastraea faveolata kept aquarium 23 days clone SGUS1012		Sunagawa et al., 2009
3750	FJ202975.1	Montastraea faveolata kept aquarium 23 days clone SGUS785		Sunagawa et al., 2009
3760	FJ202678.1	Montastraea faveolata kept aquarium 23 days clone SGUS434		Sunagawa et al., 2009
3799	AM911378.2	Lophelia pertusa red variety clone E12_CR02_full		Neulinger et al., 2008
3862	FJ202250.1	Montastraea faveolata kept aquarium 23 days clone SGUS1313		Sunagawa et al., 2009
3913	DQ889939.1	Erythropodium caribaeorum Thiotrichales clone EC7	Also clones SGUS940, SGUS1514, SGUS1531, and many more	Ranzer et al., 2006 Sunagawa et al., 2009
3991	FJ202512.1	Montastraea faveolata kept aquarium 23 days clone SGUS593		Sunagawa et al., 2009
6564	DQ917885.1	Muricea elongata Ferrimonas clone ME114		Ranzer et al., 2006
6611	FJ203654.1	Montastraea faveolata healthy tissue clone SHFH755		Sunagawa et al., 2009
6785	DQ079633.1	Vibrio coralliilyticus str. NA0301		Liu et al., 2005
6938	DQ446112.2	Siderastrea siderea black band diseased (BBD) coral tissues clone BBD_216_03		Sekar et al., 2006
6984	AY654760.1	Oculina mucus isolate 11		Koren & Rosenberg, 2004
6992	FJ202493.1	Montastraea faveolata kept aquarium 23 days clone SGUS675		Sunagawa et al., 2009
7033	GQ901063.1	Vibrio harveyi str. BBD-216-1b		Richardson et al., 2009
7050	FJ203285.1	Montastraea faveolata White Plague diseased tissue clone SHFG704		Sunagawa et al., 2009
7137	FJ202872.1	Montastraea faveolata kept aquarium 23 days clone SGUS1291	Also clone SGUS1117	Sunagawa et al., 2009
7169	AJ316167.1	Vibrio coralliilyticus str. LMG 10953		Thompson et al., 2001
7204	FJ202676.1	Montastraea faveolata kept aquarium 23 days clone SGUS1137	Also clones SGUS592, SGUS970, SGUS1387, SGUS1356	Sunagawa et al., 2009
7205	FJ202581.1	Montastraea faveolata kept aquarium 23 days clone SGUS1302		Sunagawa et al., 2009
7209	AM941185.1	coral mucus and reef waters mixture 1-8 m depth clone M26-037		Allers et al., 2008
7363	AY911392.1	Vibrio shilonii str. MP-3		Zhang et al., 2006
7509	AY911395.1	Vibrio shilonii str. SW-2		Zhang et al., 2006
7789	DQ395953.1	deep-sea octocoral clone ctg_CGOGA42		Penn et al., 2006
13200	DQ395966.1	deep-sea octocoral clone ctg_CGOGA02		Penn et al., 2006
14414	DQ395954.1	deep-sea octocoral clone ctg_CGOGA95		Penn et al., 2006
14922	DQ917890.1	Muricea elongata Achromobacter clone ME128		Ranzer et al., 2006
16921	DQ395985.1	deep-sea octocoral clone ctg_CGOGA28		Penn et al., 2006
17040	DQ395705.1	deep-sea octocoral clone ctg_CGOF363		Penn et al., 2006
28052	EF123527.1	Siderastrea siderea black band diseased (BBD) coral tissues clone RB_13f		Sekar et al., 2008
40644	AB286024.1	Janibacter corallicola str. 02PA-Ca-009	Also clone 04PA2-Co5-61	Kageyama et al., 2007
40993	AM911348.2	Lophelia pertusa red variety clone A02_CR02_full		Neulinger et al., 2008
41521	DQ395394.1	deep-sea octocoral clone ctg_BRRAA49		Penn et al., 2006
41826	AY700628.1	Australia: Great Barrier Reef clone PDM-OTU10		Boune & Munn, 2005
41976	DQ395956.1	deep-sea octocoral clone ctg_CGOGA47		Penn et al., 2006
42198	GU118752.1	Montastraea franksii clone Mfra_A07	Also , white plague diseased clone SHFG432	Sunagawa et al., 2009 Sunagawa et al., 2010
42656	FJ203303.1	Montastraea faveolata White Plague diseased tissue clone SHFG722		Sunagawa et al., 2010
42683	GU118111.1	Acropora palmata clone Apal_I17	Also clones ApaI_N03, deep-sea octocoral clone ctg_CGOAA79, white plague diseased SHFG726	Sunagawa et al., 2009 Sunagawa et al., 2010 Penn et al., 2006
42797	FJ202465.1	Montastraea faveolata kept aquarium 23 days clone SGUS1467		Sunagawa et al., 2009
42915	AM911370.1	Lophelia pertusa red variety clone D07_CR02_full		Neulinger et al., 2008
43096	FJ203576.1	Montastraea faveolata healthy tissue clone SHFH651	Also clone SHFH716	Sunagawa et al., 2009
43275	FJ203322.1	Montastraea faveolata White Plague diseased tissue clone SHFG742		Sunagawa et al., 2009
43537	FJ403074.1	Montastrea faveolata actinobacterium clone MD2.25		Johnson et al., 2008
43748	FJ203655.1	Montastraea faveolata healthy tissue clone SHFH758		Sunagawa et al., 2009
44126	FJ203282.1	Montastraea faveolata White Plague diseased tissue clone SHFG701	Also clones healthy tissue SHFH700, deep-sea octocoral ctg_CGOAA22	Sunagawa et al., 2009 Penn et al., 2006
44150	DQ395955.1	deep-sea octocoral clone ctg_CGOGA19	Also clone ctg_CGOGA43	Penn et al., 2006
48730	DQ395958.1	deep-sea octocoral clone ctg_CGOGA60		Penn et al., 2006
48918	FJ202905.1	Montastraea faveolata kept aquarium 23 days clone SGUS444	Also clone SGUS443	Sunagawa et al., 2009
49044	FJ203016.1	Montastraea faveolata White Plague diseased tissue clone SHFG393		Sunagawa et al., 2009
49199	DQ395951.1	deep-sea octocoral clone ctg_CGOGA45	Also clones ctg_CGOGA21, ctg_CGOGA89	Penn et al., 2006
49681	FJ203601.1	Montastraea faveolata healthy tissue clone SHFH689		Sunagawa et al., 2009
49684	DQ395976.1	deep-sea octocoral clone ctg_CGOGA03		Penn et al., 2006
51155	DQ395960.1	deep-sea octocoral clone ctg_CGOGA68	Also clone ctg_CGOGA44	Penn et al., 2006
51162	FJ203529.1	Montastraea faveolata healthy tissue clone SHFH600		Sunagawa et al., 2009
51169	DQ395943.1	deep-sea octocoral clone ctg_CGOGA52		Penn et al., 2006
51191	DQ395974.1	deep-sea octocoral clone ctg_CGOGA50		Penn et al., 2006
51389	DQ917891.1	Muricea elongata Acidobacteria clone ME131		Ranzer et al., 2006
51817	FJ203559.1	Montastraea faveolata healthy tissue clone SHFH631	Also clone deep-sea octocoral ctg_BRRAA88	Sunagawa et al., 2009 Penn et al., 2006
51850	DQ395470.1	deep-sea octocoral clone ctg_CGOAB70		Penn et al., 2006
51891	FJ203609.1	Montastraea faveolata healthy tissue clone SHFH698		Sunagawa et al., 2009
52045	DQ395973.1	deep-sea octocoral clone ctg_CGOGA72		Penn et al., 2006
52160	FJ203134.1	Montastraea faveolata White Plague diseased tissue clone SHFG536		Sunagawa et al., 2009
52322	FJ203486.1	Montastraea faveolata healthy tissue clone SHFH544	Also clone SHFH530	Sunagawa et al., 2009
52406	GU118797.1	Montastraea franksii Mfra_G01	Also clones healthy tissue SHFH429, MD3.21	Sunagawa et al., 2009 Sunagawa et al., 2010 Johnson et al., 2008
52452	FJ203639.1	Montastraea faveolata healthy tissue clone SHFH733		Sunagawa et al., 2009
52520	DQ395799.1	deep-sea octocoral clone ctg_CGOF235		Penn et al., 2006
52591	DQ395967.1	deep-sea octocoral clone ctg_CGOGA96		Penn et al., 2006
52794	FJ202891.1	Montastraea faveolata kept aquarium 23 days clone SGUS1001	Also clones SGUS1357, diseased tissue SHFG699, Mfav_P17	Sunagawa et al., 2009 Sunagawa et al., 2010
52864	DQ889875.1	Erythropodium caribaeorum clone EC214		Ranzer et al., 2006
52907	DQ395515.1	deep-sea octocoral clone ctg_CGOCA20		Penn et al., 2006
52937	FJ203552.1	Montastraea faveolata healthy tissue clone SHFH624	Also clones Muricea ME90, Muricea BME166	Sunagawa et al., 2009 Ranzer et al., 2006
52975	GU117939.1	Acorpora cervicornis Acer_O13	Also clones Acer_H06 , Apa_O04, healthy SHFH444	Sunagawa et al., 2009 Sunagawa et al., 2010
52995	FJ202176.1	Montastraea faveolata kept aquarium 23 days clone SGUS1480	Also clone SGUS409	Sunagawa et al., 2009
53023	FJ202893.1	Montastraea faveolata kept aquarium 23 days clone SGUS1028		Sunagawa et al., 2009
53070	FJ425596.1	Montastrea faveolata cyanobacterium clone MD3.8		Johnson et al., 2008
53175	FJ203524.1	Montastraea faveolata healthy tissue clone SHFH595	Also clone Dstr_E14	Sunagawa et al., 2009 Sunagawa et al., 2010
53185	EF372580.1	Geitlerinema sp. BBD_P2b-1 str. P2b-1		Myers et al., 2007
53211	GU118371.1	Gorgonia ventulina clone Gven_F01	Also clones Gven_C20, Gven_J17, Dstr_O18, Erythropodium caribaeorum Cyanobium clone EC49	Sunagawa et al., 2010 Ranzer et al., 2006
53215	DQ889899.1	Erythropodium caribaeorum cyanobacterium clone EC111		Ranzer et al., 2006
53239	FJ203391.1	Montastraea faveolata healthy tissue clone SHFH424		Sunagawa et al., 2009
53241	FJ203381.1	Montastraea faveolata healthy tissue clone SHFH411		Sunagawa et al., 2009
53341	FJ202199.1	Montastraea faveolata kept aquarium 23 days clone SGUS1419		Sunagawa et al., 2009
53354	DQ446127.2	Siderastrea siderea black band diseased (BBD) coral tissues clone BBD_216_32	Also clone BBD_216_24	Sekar et al., 2006
53470	DQ917809.1	Muricea elongata Mycoplasma clone BME97		Ranzer et al., 2006
53494	DQ917838.1	Muricea elongata Oscillatoria clone BME114		Ranzer et al., 2006
53605	FJ425595.1	Montastrea faveolata clone MD3.7		Johnson et al., 2008
53650	GU118106.1	Acropora palmata clone Apal_D09	Also clone ApaI_E02, ApaI_C11	Sunagawa et al., 2010
53657	FJ210722.2	Pseudoscillatoria coralii str. BgP10_4S		Rasoulouniriana et al., 2009
53732	FJ202533.1	Montastraea faveolata kept aquarium 23 days clone SGUS1324	Also clone MD3.47	Sunagawa et al., 2009 Johnson et al., 2008
53742	GU117964.1	Acropora cervicornis clone Acer_M19	Also 15 other Acer clones, aquarium clones SGUS623, SGUS1183, SGUS531	Sunagawa et al., 2009 Sunagawa et al., 2010
53823	EU249978.1	Pocillopora meandrina coral colony Palmyra Atoll clone PmeaMucG10		Speck et al., 2007
53959	FJ202607.1	Montastraea faveolata kept aquarium 23 days clone SGUS1412	Also clone SGUS386	Sunagawa et al., 2009
53991	FJ203148.1	Montastraea faveolata White Plague diseased tissue clone SHFG551		Sunagawa et al., 2009
54008	FJ202109.1	Montastraea faveolata kept aquarium 23 days clone SGUS703		Sunagawa et al., 2009
54355	FJ202344.1	Montastraea faveolata kept aquarium 23 days clone SGUS1445		Sunagawa et al., 2009
54517	FJ202783.1	Montastraea faveolata kept aquarium 23 days clone SGUS542		Sunagawa et al., 2009
54522	FJ202916.1	Montastraea faveolata kept aquarium 23 days clone SGUS955	Also >10 additional clones including White Plague diseased	Sunagawa et al., 2009 Johnson et al., 2008
54525	EF123613.1	Siderastrea siderea black band diseased (BBD) coral tissues clone UNFR_57f	Alsoo clone UNFR_14f	Sekar et al., 2008
54577	FJ202326.1	Montastraea faveolata kept aquarium 23 days clone SGUS809		Sunagawa et al., 2009
54601	DQ917897.1	Muricea elongata Arcobacter clone ME152		Ranzer et al., 2006
54645	FJ202723.1	Montastraea faveolata kept aquarium 23 days clone SGUS1254	Also clone SGUS975	Sunagawa et al., 2009
54819	FJ203095.1	Montastraea faveolata White Plague diseased tissue clone SHFG493		Sunagawa et al., 2009
55118	DQ395400.1	deep-sea octocoral clone ctg_BRRAA57	Also clones ctg_CGOCA67, ctg_CGOCA69, ctg_CGOCA75	Penn et al., 2006
55528	DQ395556.1	deep-sea octocoral clone ctg_CGOCA62		Penn et al., 2006
55633	DQ395975.1	deep-sea octocoral clone ctg_CGOGA14	Also clones ctg_CGOGA55, ctg_CGOGA67, ctg_CGOGA57, ctg_CGOGA46, ctg_CGOGA48, ctg_CGOGA40	Penn et al., 2006
55685	DQ395560.1	deep-sea octocoral clone ctg_CGOCA55	Also clone ctg_ CGOOCA50	Penn et al., 2006
55895	FJ203597.1	Montastraea faveolata healthy tissue clone SHFH683		Sunagawa et al., 2009
55912	FJ202864.1	Montastraea faveolata kept aquarium 23 days clone SGUS575	Also clone SGUS958	Sunagawa et al., 2009
55930	DQ395984.1	deep-sea octocoral clone ctg_CGOGA62		Penn et al., 2006
55947	DQ889888.1	Erythropodium caribaeorum Chloroflexi clone EC142		Ranzer et al., 2006
55989	DQ395548.1	deep-sea octocoral clone ctg_CGOCA48	Also clone Erythropodium caribaeorum Verrucomicrobia clone EC70	Ranzer et al., 2006
56035	FJ203294.1	Montastraea faveolata White Plague diseased tissue clone SHFG713	Also clone MD3.65	Sunagawa et al., 2009 Johnson et al., 2008
56272	DQ395559.1	deep-sea octocoral clone ctg_CGOCA10	Also clones ctg_CGOCA60, ctg_CGOCA74	Penn et al., 2006
56300	DQ097276.1	Fungia granulosa clone RS.Sph.002		Ben-Dov et al., 2009
56413	FJ203002.1	Montastraea faveolata kept aquarium 23 days clone SGUS578	Also Past_G22 (and 4 other clones)	Sunagawa et al., 2009 Sunagawa et al., 2010
56506	FJ203605.1	Montastraea faveolata healthy tissue clone SHFH693		Sunagawa et al., 2009
56524	FJ203528.1	Montastraea faveolata healthy tissue clone SHFH599		Sunagawa et al., 2009
56591	FJ202141.1	Montastraea faveolata kept aquarium 23 days clone SGUS933		Sunagawa et al., 2009
56660	FJ403066.1	Montastrea faveolata clone MD2.17		Johnson et al., 2008
56679	GU118230.1	Diploria strigosa clone Dstr_P12	Also aquarium SGUS1351 clone	Sunagawa et al., 2009 Sunagawa et al., 2010
56771	FJ203614.1	Montastraea faveolata healthy tissue clone SHFH703		Sunagawa et al., 2009
56780	FJ203304.1	Montastraea faveolata diseased tissue clone SHFG723	Also clone SHFG605	Sunagawa et al., 2009
56827	EU249980.1	Pocillopora meandrina coral colony Palmyra Atoll clone PmeaMucH11		Speck et al., 2007
56836	GU118387.1	Gorgonia ventulina clone Gven_P18	Also clones Gven_J06, Gven_H14, Gven_N18	Sunagawa et al., 2010
56840	FJ203110.1	Montastraea faveolata White Plague diseased tissue clone SHFG510	Also clones healthy SHFH684, Dstr_C14	Sunagawa et al., 2009 Sunagawa et al., 2010
56864	FJ203078.1	Montastraea faveolata White Plague diseased tissue clone SHFG467		Sunagawa et al., 2009
56885	EF123574.1	Siderastrea siderea black band diseased (BBD) coral tissues clone STX_07f		Sekar et al., 2008
56921	GU119120.1	Porites astreoides clone Past_B08	Also clones Gven_O20, ApaI_M07, healthy SHFH395, SHFH596	Sunagawa et al., 2009 Sunagawa et al., 2010
57007	DQ889917.1	Erythropodium caribaeorum Cytophaga clone EC64		Ranzer et al., 2006
57021	FJ203428.1	Montastraea faveolata healthy tissue clone SHFH470		Sunagawa et al., 2009
57060	DQ395893.1	deep-sea octocoral clone ctg_CGOF061	Also clone SHFG696	Penn et al., 2006 Sunagawa et al. 2009
57090	FJ203067.1	Montastraea faveolata White Plague diseased tissue clone SHFG454		Sunagawa et al., 2009
57117	FJ203440.1	Montastraea faveolata healthy tissue clone SHFH484		Sunagawa et al., 2009
57149	FJ202471.1	Montastraea faveolata kept aquarium 23 days clone SGUS1221		Sunagawa et al., 2009
57239	GU118848.1	Montastraea franksii clone Mfra_N03	Also clone SHFH501	Sunagawa et al., 2009 Sunagawa et al., 2010
57294	GU118276.1	Diploria strigosa clone Dstr_C07	Also clone SHFH662	Sunagawa et al., 2009 Sunagawa et al., 2010
57317	FJ203423.1	Montastraea faveolata healthy tissue clone SHFH461		Sunagawa et al., 2009
57354	FJ203554.1	Montastraea faveolata healthy tissue clone SHFH626		Sunagawa et al., 2009
57413	FJ202627.1	Montastraea faveolata kept aquarium 23 days clone SGUS668	Also clone Siderastrea siderea black band diseased (BBD) clone STX_48f	Sunagawa et al., 2009 Sekar et al., 2008
57519	FJ425648.1	Montastrea faveolata clone MD3.60		Johnson et al., 2008
57601	EF123506.1	Siderastrea siderea black band diseased (BBD) coral tissues clone WA_34bf		Sekar et al., 2008
57742	GU119012.1	Porite asteroides clone Past_F24		Sunagawa et al., 2010
57748	DQ395915.1	deep-sea octocoral clone ctg_CGOF043		Penn et al., 2006
57768	FJ203088.1	Montastraea faveolata White Plague diseased tissue clone SHFG483		Sunagawa et al., 2009
57790	FJ425592.1	Montastrea faveolata clone MD3.4		Johnson et al., 2008
57900	DQ395545.1	deep-sea octocoral clone ctg_CGOCA85		Penn et al., 2006
58192	FJ202186.1	Montastraea faveolata kept aquarium 23 days clone SGUS759		Sunagawa et al., 2009
58391	DQ395987.1	deep-sea octocoral clone ctg_CGOGA56		Penn et al., 2006
58529	DQ395923.1	deep-sea octocoral clone ctg_CGOF313		Penn et al., 2006
58739	FJ425650.1	Montastrea faveolata gp10 clone MD3.62		Johnson et al., 2008
58880	FJ425641.1	Montastrea faveolata clone MD3.53		Johnson et al., 2008
58901	DQ395977.1	deep-sea octocoral clone ctg_CGOGA36		Penn et al., 2006
59001	FJ202806.1	Montastraea faveolata kept aquarium 23 days clone SGUS1393	Also Oculina mucus isolates 82, 96	Sunagawa et al., 2009 Koren & Rosenberg, 2004
59032	FJ203076.1	Montastraea faveolata White Plague diseased tissue clone SHFG463		Sunagawa et al., 2009
59080	DQ395957.1	deep-sea octocoral clone ctg_CGOGA24		Penn et al., 2006
59104	FJ202650.1	Montastraea faveolata kept aquarium 23 days clone SGUS727	Also clones SGUS527, SGUS1027	Sunagawa et al., 2009
59151	AY654810.1	Oculina mucus isolate 76	Also Oculina isolate 66	Koren & Rosenberg, 2004
59188	DQ917851.1	Muricea elongata Ochrobactrum clone BME28		Ranzer et al., 2006
59235	DQ917837.1	Muricea elongata Rhodovibrio clone BME110		Ranzer et al., 2006
59391	FJ203575.1	Montastraea faveolata healthy tissue clone SHFH649		Sunagawa et al., 2009
59424	AY654771.1	Oculina mucus isolate 38	Also Oculina isolates 77, 23, 35, 72, 89	Koren & Rosenberg, 2004
59453	DQ395408.1	deep-sea octocoral clone ctg_CGOAA92		Penn et al., 2006
59488	FJ203650.1	Montastraea faveolata healthy tissue clone SHFH749		Sunagawa et al., 2009
59543	FJ202804.1	Montastraea faveolata kept aquarium 23 days clone SGUS981		Sunagawa et al., 2009
59595	FJ203080.1	Montastraea faveolata White Plague diseased tissue clone SHFG471		Sunagawa et al., 2009
59605	GU118364.1	Gorgonia ventulina clone Gven_E09	Also clones ApaI_G21, Dstr_D19, Acer_D23 Mfav_J15	Sunagawa et al., 2010
59612	GU117956.1	Acropora cervicornis clone Acer_C02	Also clones Dstr_C09, Dstr_F15, aquarium SGUS470 (and others), healthy SHFH590	Sunagawa et al., 2009 Sunagawa et al., 2010
59716	FJ202874.1	Montastraea faveolata kept aquarium 23 days clone SGUS1057		Sunagawa et al., 2009
59721	DQ889913.1	Erythropodium caribaeorum clone EC75		Ranzer et al., 2006
59763	FJ203466.1	Montastraea faveolata healthy tissue clone SHFH519		Sunagawa et al., 2009
59785	FJ203059.1	Montastraea faveolata White Plague diseased tissue clone SHFG445		Sunagawa et al., 2009
59828	FJ203378.1	Montastraea faveolata healthy tissue clone SHFH408	Also deep-sea octocoral clone ctg_CGOAB13	Sunagawa et al., 2009 Penn et al., 2006
59887	GU118285.1	Diploria strigosa clone Dstr_H24	Also clones Dstr_L07, Acer_P06, diseased SHFG719, aquarium SGUS1507	Sunagawa et al., 2009 Sunagawa et al., 2010
59891	FJ203057.1	Montastraea faveolata White Plague diseased tissue clone SHFG443	Also >20 other dieased and healthy clones, Mfra_I01, Mfra_D14, Mfra_D14, Dstr_C21	Sunagawa et al., 2009 Sunagawa et al., 2010
59934	FJ203534.1	Montastraea faveolata healthy tissue clone SHFH605	Also clone Past_L19	Sunagawa et al., 2009 Sunagawa et al., 2010
59972	FJ203583.1	Montastraea faveolata healthy tissue clone SHFH663		Sunagawa et al., 2009
60089	FJ203471.1	Montastraea faveolata healthy tissue clone SHFH525		Sunagawa et al., 2009
60344	DQ917818.1	Muricea elongata Kordiimonas clone BME17	Also clone BME118	Ranzer et al., 2006
60345	FJ203406.1	Montastraea faveolata healthy tissue clone SHFH439	Also multiple deep-sea octocoral clones including ctg_CGOAA87, ctg_CGOAA09, ctg_CGOAA33 ( + more)	Sunagawa et al., 2009 Penn et al., 2006
60377	DQ395426.1	deep-sea octocoral clone ctg_CGOAB48	Also 6 more deep-sea octocoral clones, diseased clone SHFG743	Penn et al., 2006 Sunagawa et al. 2009
60391	FJ203305.1	Montastraea faveolata White Plague diseased tissue clone SHFG724		Sunagawa et al., 2009
60401	FJ202842.1	Montastraea faveolata kept aquarium 23 days clone SGUS757		Sunagawa et al., 2009
60410	DQ644012.1	black band diseased (BBD) coral tissues clone BBD_STXF1_62	Also clone aquarium SGUS574	Richardson et al., 2006 Sunagawa et al., 2009
60443	FJ425625.1	Montastrea faveolata Rhodobacteraceae clone MD3.37	Also Siderastrea siderea black band diseased (BBD) clone BBD216b_42f	Johnson et al., 2008 Sekar et al. 2008
60499	EF123358.1	Siderastrea siderea black band diseased (BBD) clone F1_08f		Sekar et al., 2008
60572	DQ395866.1	deep-sea octocoral clone ctg_CGOF315	Also 6 more deep-sea octocoral clones	Penn et al., 2006
60595	FJ203516.1	Montastraea faveolata healthy tissue clone SHFH586		Sunagawa et al., 2009
60674	FJ202923.1	Montastraea faveolata kept aquarium 23 days clone SGUS1311		Sunagawa et al., 2009
60863	DQ395425.1	deep-sea octocoral clone ctg_CGOAA47		Penn et al., 2006
60877	AY654758.1	Oculina mucus isolate 111		Koren & Rosenberg, 2004
60899	DQ395659.1	deep-sea octocoral clone ctg_CGOF229		Penn et al., 2006
61149	DQ395932.1	deep-sea octocoral clone ctg_CGOF221		Penn et al., 2006
61176	AY654841.1	Oculina mucus isolate 95		Koren & Rosenberg, 2004
61214	DQ395477.1	deep-sea octocoral clone ctg_CGOAB89		Penn et al., 2006
61241	FJ203577.1	Montastraea faveolata healthy tissue clone SHFH652		Sunagawa et al., 2009
61258	GU118597.1	Montastraea faveolota clone Mfav_F16	Also clones Past_I13, diseased SHFG632	Sunagawa et al., 2009 Sunagawa et al., 2010
61263	GU118853.1	Montastraea franksi clone Mfra_C21	Also aquarium SGUS1513 (+ 3 clones)	Sunagawa et al., 2009 Sunagawa et al., 2010
61300	DQ395471.1	deep-sea octocoral clone ctg_CGOAA69	Also healthy SHFH485	Penn et al., 2006 Sunagawa et al. 2009
61330	FJ203565.1	Montastraea faveolata healthy tissue clone SHFH637	Also clone Mfra_E05	Sunagawa et al., 2009 Sunagawa et al., 2010
61333	GU118186.1	Diploria strigosa clone Dstr_M14	Also clone Gven_B12, deep-sea octocoral clone ctg_CGOF053	Sunagawa et al., 2010 Penn et al., 2006
61398	FJ202553.1	Montastraea faveolata kept aquarium 23 days clone SGUS550		Sunagawa et al., 2009
61401	AM911409.1	Lophelia pertusa white variety clone D05_CW03_full		Neulinger et al., 2008
61425	FJ203199.1	Montastraea faveolata White Plague diseased tissue clone SHFG606	Also aquarium SGUS1455	Sunagawa et al., 2009
61430	DQ395756.1	deep-sea octocoral clone ctg_CGOF276		Penn et al., 2006
61444	FJ202078.1	Montastraea faveolata kept aquarium 23 days clone SGUS538	Also 3 other aquarium clones	Sunagawa et al., 2009
61450	AF473921.1	Diploria strigosa with BBD clone 128-27L proteobacterium		Cooney et al., 2002
61493	AM911350.1	Lophelia pertusa red variety clone A04_CR01_full		Neulinger et al., 2008
61498	DQ395796.1	deep-sea octocoral clone ctg_CGOF245		Penn et al., 2006
61502	EF512716.1	Aurantimonas coralicida str. JL661	Also str. JL89-2	Wang et al., 2007
61509	FJ203141.1	Montastraea faveolata White Plague diseased tissue clone SHFG543	Also 3 other diseased clones	Sunagawa et al., 2009
61529	FJ202949.1	Montastraea faveolata kept aquarium 23 days clone SGUS1070		Sunagawa et al., 2009
61541	FJ202508.1	Montastraea faveolata kept aquarium 23 days clone SGUS1355		Sunagawa et al., 2009
61548	FJ202423.1	Montastraea faveolata kept aquarium 23 days clone SGUS1518		Sunagawa et al., 2009
61561	FJ202509.1	Montastraea faveolata kept aquarium 23 days clone SGUS929	Also other aquarium clones, several diseased clones including SHFG638, BBD clone RB_40f, BBD_217_19, BBD_217_17, BBD_217_06 and 3 more BBD clones	Sunagawa et al., 2009 Sekar et al., 2008 Sekar et al., 2006
61568	AY654818.1	Oculina mucus isolate 80		Koren & Rosenberg, 2004
61574	FJ202330.1	Montastraea faveolata kept aquarium 23 days clone SGUS1243		Sunagawa et al., 2009
61585	FJ203661.1	Montastraea faveolata healthy tissue clone SHFH767	Also clones healthy SHFH702 and diseased SHFG486, SHFG484, SHFG552, SHFG509, SHFG556, SHFG481, SHFG524	Sunagawa et al., 2009
61592	FJ203570.1	Montastraea faveolata healthy tissue clone SHFH643		Sunagawa et al., 2009
61645	FJ202935.1	Montastraea faveolata kept aquarium 23 days clone SGUS1461	Also 4 more aquarium clones	Sunagawa et al., 2009
61661	EF123342.1	Siderastrea siderea black band diseased (BBD) clone STX_24f	black band diseased (BBD) clone RB_37f	Sekar et al., 2008
61668	FJ202115.1	Montastraea faveolata kept aquarium 23 days clone SGUS1216	Also diseased clones SHFG412, SHFG537, and Mann16S_G05, BBD_216_07, BBD_HS216b_07	Sunagawa et al., 2009 Rypian et al., 2009 Sekar et al., 2006 Richardson et al., 2006
61678	FJ202158.1	Montastraea faveolata kept aquarium 23 days clone SGUS1458		Sunagawa et al., 2009
61681	DQ889887.1	Erythropodium caribaeorum clone EC154		Ranzer et al., 2006
61684	DQ395522.1	deep-sea octocoral clone ctg_CGOCA28		Penn et al., 2006
61701	EF123343.1	Siderastrea sidereablack band diseased (BBD) clone STX_27f		Sekar et al., 2008
61722	FJ202414.1	Montastraea faveolata kept aquarium 23 days clone SGUS1465		Sunagawa et al., 2009
61728	FJ202909.1	Montastraea faveolata kept aquarium 23 days clone SGUS737		Sunagawa et al., 2009
61766	FJ403075.1	Montastrea faveolata Rhodobacteraceae clone MD2.26	Also clone MD2.54	Johnson et al., 2008
61769	FJ202782.1	Montastraea faveolata kept aquarium 23 days clone SGUS405		Sunagawa et al., 2009
61777	FJ202529.1	Montastraea faveolata kept aquarium 23 days clone SGUS885	Also clone SGUS1482	Sunagawa et al., 2009
61780	FJ202470.1	Montastraea faveolata kept aquarium 23 days clone SGUS395		Sunagawa et al., 2009
61807	FJ203608.1	Montastraea faveolata healthy tissue clone SHFH697		Sunagawa et al., 2009
61812	EF123406.1	Siderastrea siderea black band diseased (BBD) clone F1_32f		Sekar et al., 2008
61823	FJ203171.1	Montastraea faveolata diseased tissue clone SHFG576		Sunagawa et al., 2009
61834	DQ917820.1	Muricea elongata Phyllobacterium clone BME29		Ranzer et al., 2006
61838	FJ203648.1	Montastraea faveolata healthy tissue clone SHFH747	Also clone MD2.45	Sunagawa et al., 2009 Johnson et al., 2008
61863	GU118284.1	Diploria strigosa clone Dstr_M18	Also clones Past_B16, Dstr_A07, Dstr_I15, healthy SHFH476, SHFH489, SHFH610, BBD clone F1_34f	Sunagawa et al., 2010 Sunagawa et al., 2009 Sekar et al., 2008
61864	DQ446103.2	Siderastrea siderea black band diseased (BBD) clone BBD_216_04	Also clones BBD216b_21f, BBD_216_05, BBD_217_09, BBD216b_05f	Sekar et al., 2006 Sekar et al., 2008
61897	FJ203293.1	Montastraea faveolata diseased tissue clone SHFG712		Sunagawa et al., 2009
61898	FJ203339.1	Montastraea faveolata diseased tissue clone SHFG761		Sunagawa et al., 2009
61899	FJ425632.1	Montastrea faveolata Shimia clone MD3.44	Also clone MD3.1	Johnson et al., 2008
61910	FJ203568.1	Montastraea faveolata healthy tissue clone SHFH641		Sunagawa et al., 2009
61914	FJ203011.1	Montastraea faveolata diseased tissue clone SHFG679		Sunagawa et al., 2009
61915	FJ202177.1	Montastraea faveolata kept aquarium 23 days clone SGUS1026,	Also clones healthy SHFH457, SHFH413	Sunagawa et al., 2009
61971	FJ203659.1	Montastraea faveolata healthy tissue clone SHFH765		Sunagawa et al., 2009
61974	FJ202183.1	Montastraea faveolata kept aquarium 23 days clone SGUS1403		Sunagawa et al., 2009
61983	FJ203292.1	Montastraea faveolata diseased tissue clone SHFG711	Also Siderastrea siderea BBD clone WA_17bf	Sekar et al., 2008
62016	GU118281.1	Diploria strigosa clone Dstr_J12	Also clone healthy SHFH553	Sunagawa et al., 2010 Sunagawa et al., 2009
62019	AM911425.1	Lophelia pertusa white variety clone H07_CW02_full	Also Lophelia red variety clone E07_CR02_full , Oculina mucus isolate 32	Neulinger et al., 2008 Koren & Rosenberg, 2004
62029	DQ395424.1	deep-sea octocoral clone ctg_CGOAA08		Penn et al., 2006
62057	FJ403069.1	Montastrea faveolata Rhodobacteraceae clone MD2.20		Johnson et al., 2008
62067	DQ917852.1	Muricea elongata Phyllobacterium clone BME153		Ranzer et al., 2006
62089	FJ202225.1	Montastraea faveolata kept aquarium 23 days clone SGUS600	Also Siderastrea siderea clone BBD_217_14	Sekar et al., 2006
62098	FJ203462.1	Montastraea faveolata healthy tissue clone SHFH515		Sunagawa et al., 2009
62101	FJ203264.1	Montastraea faveolata diseased tissue clone SHFG682		Sunagawa et al., 2009
62113	FJ202168.1	Montastraea faveolata kept aquarium 23 days clone SGUS1064		Sunagawa et al., 2009
62122	FJ202477.1	Montastraea faveolata kept aquarium 23 days clone SGUS935		Sunagawa et al., 2009
62127	FJ202682.1	Montastraea faveolata kept aquarium 23 days clone SGUS479		Sunagawa et al., 2009
62148	DQ917848.1	Muricea elongata Roseobacter clone BME173		Ranzer et al., 2006
62150	FJ203176.1	Montastraea faveolata diseased tissue clone SHFG581	Also multiple aquarium and several BBD clones	Sunagawa et al., 2009 Sekar et al., 2008
62157	FJ403109.1	Montastrea faveolata Rhodobacteraceae clone MD2.60		Johnson et al., 2008
62195	FJ203234.1	Montastraea faveolata diseased tissue clone SHFG646		Sunagawa et al., 2009
62208	FJ203258.1	Montastraea faveolata diseased tissue clone SHFG674		Sunagawa et al., 2009
62214	EF123392.1	Siderastrea siderea black band diseased (BBD) clone RB_22f	Also other BBD clones	Sekar et al., 2008
62228	AF473932.1	Diploria strigosa with BBD clone 128-47L proteobacterium		Cooney et al., 2002
62233	FJ203083.1	Montastraea faveolata diseased tissue clone SHFG475		Sunagawa et al., 2009
62237	DQ395613.1	deep-sea octocoral clone ctg_CGOF244	Also 4 more deep-sea octocoral clones	Penn et al., 2006
62259	FJ203203.1	Montastraea faveolata White Plague diseased tissue clone SHFG611	Also Diploria strigosa BBD clones	Sunagawa et al., 2009 Cooney et al., 2002
62262	DQ917801.1	Muricea elongata Mesorhizobium clone BME178	Also clones aquarium SGUS1495, SGUS601, MD2.49	Ranzer et al., 2006 Sunagawa et al., 2009 Johnson et al., 2008
62263	FJ203541.1	Montastraea faveolata healthy tissue clone SHFH612		Sunagawa et al., 2009
62301	DQ446093.2	Siderastrea siderea black band diseased (BBD) clone BBD_216_19		Sekar et al., 2006
62303	FJ403106.1	Montastrea faveolata Rhodobacteraceae clone MD2.57		Johnson et al., 2008
62316	FJ203288.1	Montastraea faveolata White Plague diseased tissue clone SHFG707		Sunagawa et al., 2009
62327	FJ202541.1	Montastraea faveolata kept aquarium 23 days clone SGUS685		Sunagawa et al., 2009
62373	FJ425647.1	Montastrea faveolata Rhodobacteraceae clone MD3.59	Also clones MD2.13, 12 aquarium and diseased	Johnson et al., 2008 Sunagawa et al., 2009
62379	FJ202167.1	Montastraea faveolata kept aquarium 23 days clone SGUS577	Also 3 more aquarium clones	Sunagawa et al., 2009
62390	FJ202586.1	Montastraea faveolata kept aquarium 23 days clone SGUS961		Sunagawa et al., 2009
62391	FJ202114.1	Montastraea faveolata kept aquarium 23 days clone SGUS899		Sunagawa et al., 2009
62425	GU118190.1	Diploria stigosa clone Dstr_M20	Also clones ApaI_D07, diseased SHFG729, SHFG668, SHFG733	Sunagawa et al., 2010 Sunagawa et al., 2009
62430	AY654808.1	Oculina mucus isolate 78		Koren & Rosenberg, 2004
62455	DQ917854.1	Muricea elongata clone BME80		Ranzer et al., 2006
62462	EF123390.1	Siderastrea siderea black band diseased (BBD) clone BBD216b_37f		Sekar et al., 2008
62464	FJ403081.1	Montastrea faveolata Rhodobacteraceae clone MD2.32	Also Siderastrea siderea BBD STX_11f clone	Johnson et al., 2008 Sekar et al., 2008
62493	DQ446109.2	Siderastrea siderea black band diseased (BBD) clone BBD_216_40		Sekar et al., 2006
62498	FJ403096.1	Montastrea faveolata Rhodobacteraceae clone MD2.47		Johnson et al., 2008
62503	AJ786361.1	Aurantimonas coralicida str. WP1		Stroempl et al., 2004
62506	DQ917806.1	Muricea elongata Sinorhizobium clone BME107		Ranzer et al., 2006
62516	FJ203262.1	Montastraea faveolata White Plague diseased tissue clone SHFG680		Sunagawa et al., 2009
62530	AF473915.1	Diploria strigosa with BBD clone 128-19L proteobacterium		Cooney et al., 2002
62546	FJ203181.1	Montastraea faveolata White Plague diseased tissue clone SHFG588		Sunagawa et al., 2009
62570	FJ203291.1	Montastraea faveolata White Plague diseased tissue clone SHFG710	Also 2 more clones	Sunagawa et al., 2009
62577	FJ203312.1	Montastraea faveolata White Plague diseased tissue clone SHFG731		Sunagawa et al., 2009
62584	DQ917807.1	Muricea elongata Oleiphilus clone BME103		Ranzer et al., 2006
62618	AY654757.1	Oculina mucus isolate 112		Koren & Rosenberg, 2004
62620	FJ425633.1	Montastrea faveolata clone MD3.45		Johnson et al., 2008
62639	FJ203129.1	Montastraea faveolata White Plague diseased tissue clone SHFG530		Sunagawa et al., 2009
62641	FJ202464.1	Montastraea faveolata kept aquarium 23 days clone SGUS622	Also clone MD2.39	Sunagawa et al., 2009 Johnson et al., 2008
62650	FJ202775.1	Montastraea faveolata kept aquarium 23 days clone SGUS1034		Sunagawa et al., 2009
62652	FJ202550.1	Montastraea faveolata kept aquarium 23 days clone SGUS1517		Sunagawa et al., 2009
62662	FJ203260.1	Montastraea faveolata White Plague diseased tissue clone SHFG676		Sunagawa et al., 2009
62683	EF123331.1	Siderastrea siderea black band diseased (BBD) clone STX_15f		Sekar et al., 2008
62716	FJ203039.1	Montastraea faveolata White Plague diseased tissue clone SHFG420		Sunagawa et al., 2009
62718	FJ203409.1	Montastraea faveolata healthy tissue clone SHFH442		Sunagawa et al., 2009
62735	AY654837.1	Oculina mucus isolate 39		Koren & Rosenberg, 2004
62756	AY654838.1	Oculina mucus isolate 40		Koren & Rosenberg, 2004
62770	FJ202721.1	Montastraea faveolata kept aquarium 23 days clone SGUS1194		Sunagawa et al., 2009
62780	FJ202604.1	Montastraea faveolata kept aquarium 23 days clone SGUS530		Sunagawa et al., 2009
62802	DQ917855.1	Muricea elongata Ruegeria clone ME108		Ranzer et al., 2006
62810	GQ391987.1	Silicibacter sp. str. PaD1.36a	Also clones diseased SHFG683, ApaI_P11	Vizcaino et al., 2009 Sunagawa et al., 2009 Sunagawa et al., 2010
62818	FJ202870.1	Montastraea faveolata kept aquarium 23 days clone SGUS1189		Sunagawa et al., 2009
62853	FJ425624.1	Montastrea faveolata Rhodobacteraceae clone MD3.36	Also clones Gven_H21, ctg_CGOF022, ctg_CGOF092, 4 more deep-sea octocoral clones	Johnson et al., 2008 Sunagawa et al., 2010 Penn et al., 2006
62859	FJ202395.1	Montastraea faveolata kept aquarium 23 days clone SGUS1079		Sunagawa et al., 2009
62871	FJ202786.1	Montastraea faveolata kept aquarium 23 days clone SGUS546		Sunagawa et al., 2009
62894	FJ202880.1	Montastraea faveolata kept aquarium 23 days clone SGUS1060		Sunagawa et al., 2009
62896	FJ202552.1	Montastraea faveolata kept aquarium 23 days clone SGUS1113		Sunagawa et al., 2009
62916	DQ395651.1	deep-sea octocoral clone ctg_CGOF150	Also 3 more deep-sea octocoral clones	Penn et al., 2006
62918	FJ203147.1	Montastraea faveolata White Plague diseased tissue clone SHFG550		Sunagawa et al., 2009
65831	DQ395551.1	deep-sea octocoral clone ctg_CGOCA86		Penn et al., 2006
65835	DQ395894.1	deep-sea octocoral clone ctg_CGOF307		Penn et al., 2006
65875	FJ203097.1	Montastraea faveolata White Plague diseased tissue clone SHFG495		Sunagawa et al., 2009
66006	FJ203619.1	Montastraea faveolata healthy tissue clone SHFH709		Sunagawa et al., 2009
66023	AY654825.1	Oculina mucus isolate 88	Also Oculina mucus isolate 37	Koren & Rosenberg, 2004
66027	DQ395462.1	deep-sea octocoral clone ctg_CGOAA74		Penn et al., 2006
66200	DQ395624.1	deep-sea octocoral clone ctg_CGOF071		Penn et al., 2006
66299	AY654753.1	Oculina mucus isolate 117		Koren & Rosenberg, 2004
66320	EF123625.1	Siderastrea siderea black band diseased (BBD) clone UNFR_16f	Also aquarium clones SGUS1244, SGUS389	Sekar et al., 2008 Sunagawa et al., 2009
66350	FJ403056.1	Montastrea faveolata Flavobacteriales clone MD2.7	Also aquarium clone SGUS508	Johnson et al., 2008 Sunagawa et al., 2009
66358	DQ395555.1	deep-sea octocoral clone ctg_CGOCA81		Penn et al., 2006
66412	AY654759.1	Oculina mucus isolate 110	Also Oculina mucus isolates 85, 28	Koren & Rosenberg, 2004
66452	FJ203005.1	Montastraea faveolata kept aquarium 23 days clone SGUS629		Sunagawa et al., 2009
66526	FJ203626.1	Montastraea faveolata healthy tissue clone SHFH718		Sunagawa et al., 2009
66563	DQ395657.1	deep-sea octocoral clone ctg_CGOF173		Penn et al., 2006
66585	FJ202207.1	Montastraea faveolata kept aquarium 23 days clone SGUS748		Sunagawa et al., 2009
66640	FJ202066.1	Montastraea faveolata kept aquarium 23 days clone SGUS1082	Also clones diseased SHFG596, Mfra_C09, Oculina mucus isolate 106, Siderastrea siderea BBD RB_07f	Sunagawa et al., 2009 Sunagawa et al., 2010 Koren & Rosenberg, 2004 Sekar et al., 2008
66651	FJ203271.1	Montastraea faveolata White Plague diseased tissue clone SHFG690	Also clone MD3.64	Sunagawa et al., 2009 Johnson et al., 2008
66671	FJ203530.1	Montastraea faveolata healthy tissue clone SHFH601		Sunagawa et al., 2009
66686	FJ202911.1	Montastraea faveolata kept aquarium 23 days clone SGUS1135		Sunagawa et al., 2009
66723	FJ203427.1	Montastraea faveolata healthy tissue clone SHFH467	Also clones SHFH415, ApaI_C14	Sunagawa et al., 2009 Sunagawa et al., 2010
66745	EF123558.1	Siderastrea siderea black band diseased (BBD) clone WA_18bf		Sekar et al., 2008
66764	FJ403077.1	Montastrea faveolata Flavobacteriaceae clone MD2.28		Johnson et al., 2008
66799	GU118567.1	Montastraea faveolata clone Mfav_B06	Also 8 other clones, diseased SHFG437, healthy SHGH448	Sunagawa et al., 2010 Sunagawa et al., 2009
66817	AY654766.1	Oculina mucus isolate 20		Koren & Rosenberg, 2004
68561	FJ202346.1	Montastraea faveolata kept aquarium 23 days clone SGUS584		Sunagawa et al., 2009
68568	FJ403071.1	Montastrea faveolata Bacteroidetes clone MD2.22	Also clones MD3.34, MD2.6	Johnson et al., 2008
68571	FJ202203.1	Montastraea faveolata kept aquarium 23 days clone SGUS1126		Sunagawa et al., 2009
68708	FJ203162.1	Montastraea faveolata White Plague diseased tissue clone SHFG566		Sunagawa et al., 2009
68858	FJ202099.1	Montastraea faveolata kept aquarium 23 days clone SGUS653		Sunagawa et al., 2009
69069	FJ202527.1	Montastraea faveolata kept aquarium 23 days clone SGUS438	Also Siderastrea siderea BBD216b_15f	Sunagawa et al., 2009 Sekar et al., 2008
69183	FJ202599.1	Montastraea faveolata kept aquarium 23 days clone SGUS610	Also many other aquarium clones	Sunagawa et al., 2009
69403	FJ202953.1	Montastraea faveolata kept aquarium 23 days clone SGUS1425		Sunagawa et al., 2009
69429	FJ202774.1	Montastraea faveolata kept aquarium 23 days clone SGUS1261	Also 3 more aquarium clones	Sunagawa et al., 2009
69497	FJ202260.1	Montastraea faveolata kept aquarium 23 days clone SGUS447	Also SGUS457, Mfav_P04, SGUS1359	Sunagawa et al., 2009 Sunagawa et al., 2010
69533	FJ203657.1	Montastraea faveolata healthy tissue clone SHFH760		Sunagawa et al., 2009
69583	FJ202485.1	Montastraea faveolata kept aquarium 23 days clone SGUS1305	Also clone SGUS607	Sunagawa et al., 2009
69695	DQ395523.1	deep-sea octocoral clone ctg_CGOCA58		Penn et al., 2006
69960	FJ202295.1	Montastraea faveolata kept aquarium 23 days clone SGUS966		Sunagawa et al., 2009
69964	EF123532.1	Siderastrea siderea black band diseased (BBD) clone STX_02f	Also clones aquarium SGUS544, Siderastrea siderea BBD_216_02, healthy SHFH623, Dstr_N03	Sunagawa et al., 2009 Sekar et al., 2006 Sunagawa et al., 2010
69965	FJ202473.1	Montastraea faveolata kept aquarium 23 days clone SGUS422		Sunagawa et al., 2009
69967	FJ202134.1	Montastraea faveolata kept aquarium 23 days clone SGUS568		Sunagawa et al., 2009
69994	FJ202794.1	Montastraea faveolata kept aquarium 23 days clone SGUS873		Sunagawa et al., 2009
70001	FJ203029.1	Montastraea faveolata White Plague diseased tissue clone SHFG410	Also 7 more aquarium clones, MD2.56, Siderastrea siderea WA_20bf, BBD_216_36	Sunagawa et al., 2009 Johnson et al., 2008 Sekar et al., 2006, 2008
70030	FJ202657.1	Montastraea faveolata kept aquarium 23 days clone SGUS1209		Sunagawa et al., 2009
70060	FJ202337.1	Montastraea faveolata kept aquarium 23 days clone SGUS782		Sunagawa et al., 2009
70063	FJ202205.1	Montastraea faveolata kept aquarium 23 days clone SGUS1530		Sunagawa et al., 2009
70068	FJ202656.1	Montastraea faveolata kept aquarium 23 days clone SGUS744		Sunagawa et al., 2009
70070	FJ202847.1	Montastraea faveolata kept aquarium 23 days clone SGUS884		Sunagawa et al., 2009
70087	FJ202532.1	Montastraea faveolata kept aquarium 23 days clone SGUS1068	Also many other aquarium clones	Sunagawa et al., 2009
70094	FJ202869.1	Montastraea faveolata kept aquarium 23 days clone SGUS908		Sunagawa et al., 2009
70115	FJ202192.1	Montastraea faveolata kept aquarium 23 days clone SGUS456		Sunagawa et al., 2009
70137	FJ202131.1	Montastraea faveolata kept aquarium 23 days clone SGUS1481		Sunagawa et al., 2009
70155	FJ202833.1	Montastraea faveolata kept aquarium 23 days clone SGUS665		Sunagawa et al., 2009
70158	FJ202630.1	Montastraea faveolata kept aquarium 23 days clone SGUS396		Sunagawa et al., 2009
70160	FJ202826.1	Montastraea faveolata kept aquarium 23 days clone SGUS441		Sunagawa et al., 2009
70161	FJ202211.1	Montastraea faveolata kept aquarium 23 days clone SGUS1142	Also many other aquarium clones	Sunagawa et al., 2009
70162	FJ202232.1	Montastraea faveolata kept aquarium 23 days clone SGUS891		Sunagawa et al., 2009
70172	FJ202592.1	Montastraea faveolata kept aquarium 23 days clone SGUS859		Sunagawa et al., 2009
70197	FJ202190.1	Montastraea faveolata kept aquarium 23 days clone SGUS491		Sunagawa et al., 2009
70206	FJ202845.1	Montastraea faveolata kept aquarium 23 days clone SGUS1270		Sunagawa et al., 2009
70212	FJ202381.1	Montastraea faveolata kept aquarium 23 days clone SGUS721		Sunagawa et al., 2009
70275	FJ202649.1	Montastraea faveolata kept aquarium 23 days clone SGUS533		Sunagawa et al., 2009
70316	FJ203156.1	Montastraea faveolata White Plague diseased tissue clone SHFG559		Sunagawa et al., 2009
70329	FJ202303.1	Montastraea faveolata kept aquarium 23 days clone SGUS1293		Sunagawa et al., 2009
70337	FJ202930.1	Montastraea faveolata kept aquarium 23 days clone SGUS1405		Sunagawa et al., 2009
70353	FJ202107.1	Montastraea faveolata kept aquarium 23 days clone SGUS1171		Sunagawa et al., 2009
70366	FJ202163.1	Montastraea faveolata kept aquarium 23 days clone SGUS1251	Also 6 more aquarium clones	Sunagawa et al., 2009
70368	FJ202628.1	Montastraea faveolata kept aquarium 23 days clone SGUS822		Sunagawa et al., 2009
70382	FJ202222.1	Montastraea faveolata kept aquarium 23 days clone SGUS566		Sunagawa et al., 2009
70393	FJ202445.1	Montastraea faveolata kept aquarium 23 days clone SGUS657		Sunagawa et al., 2009
70402	FJ202883.1	Montastraea faveolata kept aquarium 23 days clone SGUS1004		Sunagawa et al., 2009
70403	FJ202854.1	Montastraea faveolata kept aquarium 23 days clone SGUS860		Sunagawa et al., 2009
70405	FJ202138.1	Montastraea faveolata kept aquarium 23 days clone SGUS682	Also many other aquarium clones, diseased SHFG661	Sunagawa et al., 2009
70407	FJ202666.1	Montastraea faveolata kept aquarium 23 days clone SGUS680		Sunagawa et al., 2009
70409	FJ202546.1	Montastraea faveolata kept aquarium 23 days clone SGUS1520		Sunagawa et al., 2009
70410	FJ202754.1	Montastraea faveolata kept aquarium 23 days clone SGUS827		Sunagawa et al., 2009
70445	FJ202769.1	Montastraea faveolata kept aquarium 23 days clone SGUS604		Sunagawa et al., 2009
70485	FJ202951.1	Montastraea faveolata kept aquarium 23 days clone SGUS1268		Sunagawa et al., 2009
70496	FJ202506.1	Montastraea faveolata kept aquarium 23 days clone SGUS1341		Sunagawa et al., 2009
70534	FJ202538.1	Montastraea faveolata kept aquarium 23 days clone SGUS1125		Sunagawa et al., 2009
70549	FJ202265.1	Montastraea faveolata kept aquarium 23 days clone SGUS1383		Sunagawa et al., 2009
70550	FJ202104.1	Montastraea faveolata kept aquarium 23 days clone SGUS611		Sunagawa et al., 2009
70554	FJ202602.1	Montastraea faveolata kept aquarium 23 days clone SGUS1011		Sunagawa et al., 2009
70559	FJ202587.1	Montastraea faveolata kept aquarium 23 days clone SGUS949		Sunagawa et al., 2009
70592	FJ202755.1	Montastraea faveolata kept aquarium 23 days clone SGUS795		Sunagawa et al., 2009
70604	FJ202481.1	Montastraea faveolata kept aquarium 23 days clone SGUS662		Sunagawa et al., 2009
70606	FJ202308.1	Montastraea faveolata kept aquarium 23 days clone SGUS1257		Sunagawa et al., 2009
70805	DQ446131.2	Siderastrea siderea black band diseased (BBD) clone BBD_217_15		Sekar et al., 2006
70811	FJ202882.1	Montastraea faveolata kept aquarium 23 days clone SGUS1317		Sunagawa et al., 2009
70889	DQ395494.1	deep-sea octocoral clone ctg_CGOAB08		Penn et al., 2006
71167	DQ395404.1	deep-sea octocoral clone ctg_BRRAA28		Penn et al., 2006
71181	DQ395844.1	deep-sea octocoral clone ctg_CGOF052		Penn et al., 2006
71210	DQ917864.1	Muricea elongata Epulopiscium clone ME47		Ranzer et al., 2006
72740	FJ202578.1	Montastraea faveolata kept aquarium 23 days clone SGUS724	Also clones SGUS1212, Mfav_P05, MD3.13	Sunagawa et al., 2009 Sunagawa et al., 2010 Johnson et al., 2008
72949	FJ203077.1	Montastraea faveolata White Plague diseased tissue clone SHFG464		Sunagawa et al., 2009
73221	FJ203071.1	Montastraea faveolata White Plague diseased tissue clone SHFG458		Sunagawa et al., 2009
73255	FJ203649.1	Montastraea faveolata healthy tissue clone SHFH748		Sunagawa et al., 2009
73266	DQ446174.2	Siderastrea siderea black band diseased (BBD) clone BBD_217_18		Sekar et al., 2006
73349	EF123560.1	Siderastrea siderea black band diseased (BBD) clone RB_14f	Also clones diseased SHFG708, 13 deep-sea octocoral clones	Sekar et al., 2008 Sunagawa et al., 2009 Penn et al., 2006
73445	FJ202555.1	Montastraea faveolata kept aquarium 23 days clone SGUS916		Sunagawa et al., 2009
73455	FJ203161.1	Montastraea faveolata White Plague diseased tissue clone SHFG565		Sunagawa et al., 2009
73479	FJ203032.1	Montastraea faveolata White Plague diseased tissue clone SHFG413		Sunagawa et al., 2009
73512	GU118814.1	Montastraea franksi clone Mfra_M22	Also clones Mfav_I07, diseased SHFG749, SHFG613	Sunagawa et al., 2010 Sunagawa et al., 2009
73572	DQ917821.1	Muricea elongata Microscilla clone BME34		Ranzer et al., 2006
73577	FJ203593.1	Montastraea faveolata healthy tissue clone SHFH677		Sunagawa et al., 2009
73578	FJ203340.1	Montastraea faveolata White Plague diseased tissue clone SHFG762		Sunagawa et al., 2009
73584	FJ203538.1	Montastraea faveolata healthy tissue clone SHFH609		Sunagawa et al., 2009
73587	DQ395351.1	deep-sea octocoral clone ctg_BRRAA93		Penn et al., 2006
73595	FJ425620.1	Montastrea faveolata Flexibacteraceae clone MD3.32	Also Siderastrea siderea BBD_STXF1_96	Johnson et al., 2008 Richardson et al., 2006
73664	FJ203020.1	Montastraea faveolata White Plague diseased tissue clone SHFG399		Sunagawa et al., 2009
73668	FJ203043.1	Montastraea faveolata White Plague diseased tissue clone SHFG425		Sunagawa et al., 2009
73674	FJ425608.1	Montastrea faveolata Flexibacteraceae clone MD3.20		Johnson et al., 2008
73684	FJ203017.1	Montastraea faveolata White Plague diseased tissue clone SHFG394		Sunagawa et al., 2009
73709	FJ203331.1	Montastraea faveolata White Plague diseased tissue clone SHFG752		Sunagawa et al., 2009
73724	FJ202064.1	Montastraea faveolata kept aquarium 23 days clone SGUS492	Also clones Acer_D19, Dstr_N20	Sunagawa et al., 2009 Sunagawa et al., 2010
73782	GU118220.1	Diploria strigosa clone Dstr_K24	Also clones Mfav_O11, MD2.40, healthy SHFH634, Mfra_E13	Sunagawa et al., 2010 Johnson et al., 2008 Sunagawa et al., 2009
73797	FJ425640.1	Montastrea faveolata Flexibacteraceae clone MD3.52		Johnson et al., 2008
73804	FJ202278.1	Montastraea faveolata kept aquarium 23 days clone SGUS482	Many other clones including Dstr_L09, ApaI_N14, Mfra_E12,	Sunagawa et al., 2009 Sunagawa et al., 2010
73827	DQ395535.1	deep-sea octocoral clone ctg_CGOCA04		Penn et al., 2006
73973	GU118827.1	Montastraea franksi clone Mfra_D03	Also clones Dstr_J08, Mfav_K17, healthy SHFH619, diseased SHFG419 and more	Sunagawa et al., 2010 Sunagawa et al., 2009
73979	FJ202283.1	Montastraea faveolata kept aquarium 23 days clone SGUS912		Sunagawa et al., 2009
74022	FJ202772.1	Montastraea faveolata kept aquarium 23 days clone SGUS1206	Also many diseased clones	Sunagawa et al., 2009 Sunagawa et al., 2010
74043	FJ203647.1	Montastraea faveolata healthy tissue clone SHFH744		Sunagawa et al., 2009
74107	FJ203070.1	Montastraea faveolata White Plague diseased tissue clone SHFG457		Sunagawa et al., 2009
74109	GU119173.1	Porites astreoides clone Past_N05	Also clones Dstr_I120, ctg_BRRAA67 and more	Sunagawa et al., 2010 Penn et al., 2006
74216	FJ203358.1	Montastraea faveolata healthy tissue clone SHFH734		Sunagawa et al., 2009
74332	FJ425628.1	Montastrea faveolata clone MD3.40		Johnson et al., 2008
74345	FJ202085.1	Montastraea faveolata kept aquarium 23 days clone SGUS540		Sunagawa et al., 2009
74403	FJ203195.1	Montastraea faveolata White Plague diseased tissue clone SHFG602		Sunagawa et al., 2009
74425	FJ203125.1	Montastraea faveolata White Plague diseased tissue clone SHFG526		Sunagawa et al., 2009
74467	FJ203306.1	Montastraea faveolata White Plague diseased tissue clone SHFG725		Sunagawa et al., 2009
74483	FJ203542.1	Montastraea faveolata healthy tissue clone SHFH613		Sunagawa et al., 2009
74577	FJ203244.1	Montastraea faveolata White Plague diseased tissue clone SHFG657		Sunagawa et al., 2009
74596	AY654823.1	Oculina mucus isolate 86		Koren & Rosenberg, 2004
74622	FJ203496.1	Montastraea faveolata healthy tissue clone SHFH555		Sunagawa et al., 2009
74636	FJ425602.1	Montastrea faveolata cyanobacterium clone MD3.14		Johnson et al., 2008
74659	FJ203477.1	Montastraea faveolata healthy tissue clone SHFH531	Also clones Past_L22, Mfra_L15, Dstr_H11, diseased clones and more	Sunagawa et al., 2009 Sunagawa et al., 2010
74771	FJ202817.1	Montastraea faveolata kept aquarium 23 days clone SGUS1512	Also clone Mfav MD2.5	Sunagawa et al., 2009 Johnson et al., 2008
74785	FJ203311.1	Montastraea faveolata White Plague diseased tissue clone SHFG730		Sunagawa et al., 2009
74817	FJ202832.1	Montastraea faveolata kept aquarium 23 days clone SGUS924		Sunagawa et al., 2009
74818	FJ203366.1	Montastraea faveolata healthy tissue clone SHFH391		Sunagawa et al., 2009
74847	DQ395524.1	deep-sea octocoral clone ctg_CGOCA57		Penn et al., 2006
74898	FJ203504.1	Montastraea faveolata healthy tissue clone SHFH568		Sunagawa et al., 2009
74958	FJ202421.1	Montastraea faveolata kept aquarium 23 days clone SGUS849		Sunagawa et al., 2009
74959	FJ203485.1	Montastraea faveolata healthy tissue clone SHFH543		Sunagawa et al., 2009
74977	FJ203606.1	Montastraea faveolata healthy tissue clone SHFH694		Sunagawa et al., 2009
74990	FJ203472.1	Montastraea faveolata healthy tissue clone SHFH526		Sunagawa et al., 2009
75019	FJ203458.1	Montastraea faveolata healthy tissue clone SHFH509		Sunagawa et al., 2009
75029	FJ202160.1	Montastraea faveolata kept aquarium 23 days clone SGUS1002		Sunagawa et al., 2009
75226	GU119661.1	chloroplast clone Dstr_C23	Also clones healthy SHFH604, SHFH475, Mfra_I09	Sunagawa et al., 2010 Sunagawa et al., 2009
75237	GU119626.1	chloroplast clone Dstr_E19	Also clones Gven_A14 and more	Sunagawa et al., 2010
75275	FJ203191.1	Montastraea faveolata White Plague diseased tissue clone SHFG598		Sunagawa et al., 2009
75384	FJ203641.1	Montastraea faveolata healthy tissue clone SHFH737		Sunagawa et al., 2009
75385	FJ203461.1	Montastraea faveolata healthy tissue clone SHFH512		Sunagawa et al., 2009
75404	FJ203603.1	Montastraea faveolata healthy tissue clone SHFH691		Sunagawa et al., 2009
75494	FJ203228.1	Montastraea faveolata diseased tissue clone SHFG639		Sunagawa et al., 2009
75584	FJ203336.1	Montastraea faveolata diseased tissue clone SHFG758		Sunagawa et al., 2009
75593	FJ203418.1	Montastraea faveolata healthy tissue clone SHFH453		Sunagawa et al., 2009
75632	FJ203380.1	Montastraea faveolata healthy tissue clone SHFH410		Sunagawa et al., 2009
75636	DQ395611.1	deep-sea octocoral clone ctg_CGOF136		Penn et al., 2006
75638	FJ203174.1	Montastraea faveolata White Plague diseased tissue clone SHFG579		Sunagawa et al., 2009
75707	FJ203465.1	Montastraea faveolata healthy tissue clone SHFH518		Sunagawa et al., 2009
75717	FJ202795.1	Montastraea faveolata kept aquarium 23 days clone SGUS1097		Sunagawa et al., 2009
75728	FJ203376.1	Montastraea faveolata healthy tissue clone SHFH405		Sunagawa et al., 2009
75741	DQ395539.1	deep-sea octocoral clone ctg_CGOCA43		Penn et al., 2006
75822	FJ203600.1	Montastraea faveolata healthy tissue clone SHFH687		Sunagawa et al., 2009
75828	FJ203553.1	Montastraea faveolata healthy tissue clone SHFH625		Sunagawa et al., 2009
75903	FJ203180.1	Montastraea faveolata White Plague diseased tissue clone SHFG587		Sunagawa et al., 2009
75997	GU118646.1	Montastraea faveolata clone Mfav_L02	Also clones Mfra_P20, healthy SHFH583	Sunagawa et al., 2010 Sunagawa et al., 2009
76044	FJ202296.1	Montastraea faveolata kept aquarium 23 days clone SGUS1039		Sunagawa et al., 2009
76383	FJ203346.1	Montastraea faveolata healthy tissue clone SHFH403		Sunagawa et al., 2009
77078	FJ203063.1	Montastraea faveolata White Plague diseased tissue clone SHFG450		Sunagawa et al., 2009
*This table was generated by applying the following list of search terms to the comprehensive list of almost 60,000 OTUs and then manually curating that list to remove OTUs with descriptions that contained a key word but were not in fact coral-associated. Search terms: Acropora, BBD, coral, Diploria, Fungia, Lophelia, Madrepora, Montastraea, mucus, Muricea, octocoral, octacoral (deliberate misspe…

## Sheet: Detailed References
Allers, et al. 2008, Microbes enriched in seawater after addition of coral mucus. Appl. Environ. Microbiol. 74(10): 3274-3278
Ben-Dov et al., 2009, An in situ method for cultivating microorganisms using a double encapsulation technique. FEMS Microbiol. Ecol. 68(3): 363-371
Bourne & Munn, 2005, Diversity of bacteria associated with the coral Pocillopora damicornis from the Great Barrier Reef. Environ. Microbiol. 7(8): 1162-1174
Cooney et al., 2002, Characterization of the bacterial consortium associated with black band disease in coral using molecular microbiological techniques. Environ. Microbiol. 4(7): 401-413
Johnson et al., 2008 direct submission
Kageyama et al., 2007, Janibacter corallicola sp. nov., isolated from coral in Palau. J. Gen. Appl. Microbiol. 53(3): 185-189
Koren & Rosenberg, 2004 direct submission
Liu et al., 2005 direct submission
Myers, et al., 2007, Molecular detection and ecological significance of the cyanobacterial genera Geitlerinema and Leptolyngbya in black band disease of corals. Appl. Environ. Microbiol. 73(16): 5173-5182
Neulinger et al., 2008, Phenotype-specific bacterial communities in the cold-water coral Lophelia pertusa (Scleractinia) and their implications for the coral's nutrition, health, and distribution. Appl. Environ. Microbiol. 74(23): 7272-7285
Penn et al., 2006
Ranzer et al. 2006 direct submission
Rasoulouniriana et al., 2009, Pseudoscillatoria coralii gen. nov., sp. nov., a cyanobacterium associated with coral black band disease (BBD). Dis. Aquat. Org. 87(1-2): 91-96
Richardson et al., 2006 direct submission
Richardson et al., 2009, Sulfide, microcystin, and the etiology of black band disease. Dis. Aquat. Org. 87(1-2): 79-90
Sekar et al., 2006, Microbial communities in the surface mucopolysaccharide layer and the black band microbial mat of black band-diseased Siderastrea siderea. Appl. Environ. Microbiol. 72(9): 5963-5973
Sekar et al., 2008, Microbial community composition of black band disease on the coral host Siderastrea siderea from three regions of the wider Caribbean. Mar. Ecol. Prog. Ser. 362: 85-98
Stroempl et al., 2004 direct submission
Sunagawa et al., 2009
Sunagawa et al., 2010
Thompson et al., 2001, Genomic diversity amongst Vibrio isolates from different sources determined by fluorescent amplified fragment length polymorphism. Syst. Appl. Microbiol. 24(4): 520-538
Thompson et al., 2006, Thalassomonas loyana sp. Nov., a causative agent of the white plague-like disease of corals on the Eilat coral reef. Int. J. Syst. Evol. Microbiol. 56 (PT 2): 365-368
Vizcaino et al., 2009 direct submission
Wang et al., 2007 direct submission
Zhang et al., 2006, Identification of environmental plasmid-bearing Vibrio species isolated from polluted and pristine marine reserves of Hong Kong, and resistance to antibiotics and mercury. Antonie Van Leeuwenhoek 89(3-4): 307-315
